# Supplementary material for: Degranulation of gastrointestinal mast cells contributes to hepatic ischemia–reperfusion injury in mice
Source: Oxford University Press journal article supplement (doi:10.1042/cs20180662), 2018-10-09
Supplement: cs20180662_supp1.pdf [file cs20180662_supp1.pdf]

| Gene Name     | Sequence (5'-3')                                               |
|---------------|----------------------------------------------------------------|
| GAPDH         | 5'-AGGTCGGTGTGAACGGATTTG-3'<br>5'-TGTAGACCATGTAGTTGAGGTCA-3'   |
| C-KIT         | 5'-CTCCCCAACAGTGTATTAC-3'<br>5'-TAGCCCGAAATCGCAAATCTT-3'       |
| TPSB2         | 5'-CTGGCTAGTCTGGTGTACTCA-3'<br>5'-CAGGGCCACTTACTCTCAGAA-3'     |
| TNF- $\alpha$ | 5'-GACGTGGAAGTGGCAGAAGAG-3'<br>5'-TTGGTGGTTTGTGAGTGTGAG-3'     |
| IL-1 $\beta$  | 5'-GCAACTGTTCCCTGAACTCAACT-3'<br>5'-ATCTTTTGGGGTCCGTCAACT-3'   |
| IL-6          | 5'-TAGTCCTTCCTACCCCAATTTCC-3'<br>5'-TTGGTCCTTAGCCACTCCTTC-3'   |
| IL-12         | 5'-TGGTTTGCCATCGTTTTGCTG-3'<br>5'-ACAGGTGAGGTTCACTGTTTCT-3'    |
| MCP-1         | 5'-TTAAAAACCTGGATCGGAACCAA-3'<br>5'-GCATTAGCTTCAGATTTACGGGT-3' |
| RANTES        | 5'-GCTGCTTTGCCTACCTCTCC-3'<br>5'-TCGAGTGACAAACACGACTGC-3'      |
| CXCL1         | 5'-CTGGGATTCACCTCAAGAACATC-3'<br>5'-CAGGGTCAAGGCAAGCCTC-3'     |
| CXCL2         | 5'-CCAACCACCAGGCTACAGG-3'<br>5'-GCGTCACACTCAAGCTCTG-3'         |
| CCL3          | 5'-TTCTCTGTACCATGACACTCTGC-3'<br>5'-CGTGGAAATCTTCCGGCTGTAG-3'  |
| NOS2          | 5'-GTTCTCAGCCCAACAATACAAGA-3'<br>5'-GTGGACGGGTCGATGTAC-3'      |
| ZO-1          | 5'-GCCGCTAAGAGCACAGCAA-3'<br>5'-TCCCCACTCTGAAAATGAGGA-3'       |
| Occludin      | 5'-TTGAAAGTCCACCTCCTTACAGA-3'<br>5'-CCGGATAAAAAGAGTACGCTGG-3'  |
| E-cad         | 5'-CAGGTCTCCTCATGGCTTTGC-3'<br>5'-CTTCCGAAAAGAAGGCTGTCC-3'     |
| JAM-A         | 5'-TCTCTTACGTCTATGATCCTGG-3'<br>5'-TTTGATGGACTCGTTCTCGGG-3'    |
| IL-9          | 5'-ATGTTGGTGACATACATCCTTGC-3'<br>5'-TGACGGTGGATCATCCTTCAG-3'   |
| IFN- $\gamma$ | 5'-ATGAACGCTACACACTGCATC-3'<br>5'-CCATCCTTTTGCCAGTTCCTC-3'     |

**Table S1. Primers for Quantitative RT-PCR**
